# Supplementary material for: Melanotic Neuroectodermal Tumor of Infancy (MNTI) and Pineal Anlage Tumor (PAT) Harbor A Medulloblastoma Signature by DNA Methylation Profiling
Source: MDPI journal article supplement (doi:10.3390/cancers13040706), 2021-02-09
Supplement: s1 [file s1]

# Methylation profiling report

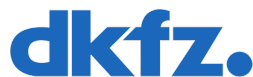

GERMAN  
CANCER RESEARCH CENTER  
IN THE HELMHOLTZ ASSOCIATION

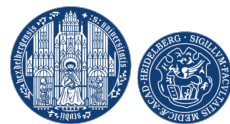

Heidelberg University Hospital

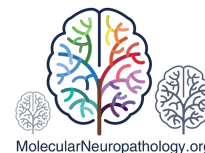

## General information

Sentrix ID: 203939360072\_R04C01  
Array type: EPIC  
Material type: FFPE DNA  
Gender: female

## Medulloblastoma methylation classifier results (v1.0)

### Methylation classes (MCs with score $\geq 0.3$ )

| Methylation classes (MCs with score $\geq 0.3$ ) | Calibrated score | Interpretation                              |
|--------------------------------------------------|------------------|---------------------------------------------|
| medulloblastoma, subclass group 3/4, subtype II  | 0.72             | no match <span style="color: red;">✗</span> |

Legend: ✔ Match (score  $\geq 0.9$ ) ✗ No match (score  $< 0.9$ ): possibly still relevant for low tumor content and low DNA quality cases. ● Match to MC family member (score  $\geq 0.5$ )

## Class descriptions

**Medulloblastoma, subclass group 3/4, subtype II:** The methylation class "medulloblastoma, subclass group 3/4, subtype II" is comprised of tumors with the diagnosis medulloblastoma. Histologically, most cases fall into the classic (50%) or large-cell/anaplastic group (45%) and 5% cases fall in the DN/MBEN group. Median age is 5 years (range 1 to 17). The majority (55%) are M+. Male:Female ratio is 3.3:1. Subtype II medulloblastomas are enriched for chr8 and chr17, isochromosome 17q (i17q), chr13q gain and chr 16 loss, and are enriched for MYC amplification (20% of cases). Subtype% in II is high-risk (5-year OS ~ 49% in retrospective series). This subtype is comprised of 100% Grp3 subgroup tumors.

## Copy number variation profile

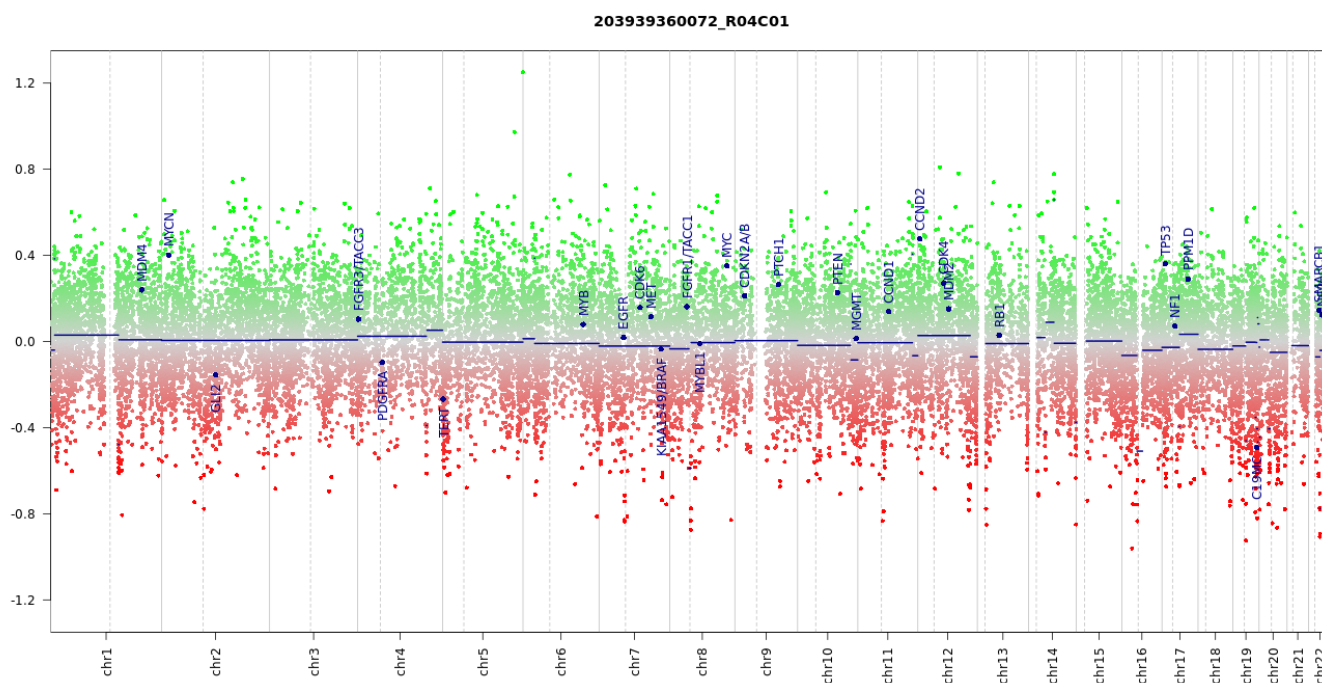

Depiction of chromosome 1 to 22 (and X/Y if automatic prediction was successful). Gains/amplifications represent positive, losses negative deviations from the baseline. 29 brain tumor relevant gene regions are highlighted for easier assessment.

(see Hovestadt & Zapatka, <http://www.bioconductor.org/packages/devel/bioc/html/conumee.html>)

MGMT promotor methylation (MGMT-STP27)

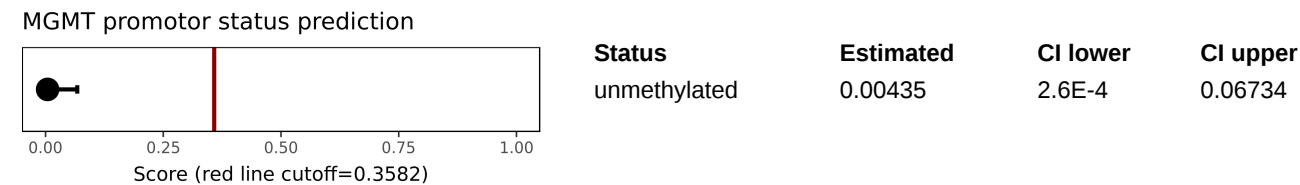

(see Bady et al, J Mol Diagn 2016; 18(3):350-61)

Disclaimer

Classification using methylation profiling is a research tool under development, it is not verified and has not been clinically validated. Implementation of the results in a clinical setting is in the sole responsibility of the treating physician. Intended for non-commercial use only.

Run information

Report: idat\_reportMeduloblastoma\_v1\_0 Version 1.0  
Task version:

| Task                       | Version |
|----------------------------|---------|
| idat_qc                    | 2.0     |
| idat_rs_gender             | 2.0     |
| idat_predictMGMT           | 2.0     |
| idat_cnvp                  | 3.0     |
| idat_predictMeduloblastoma | 1.0     |
