# Supplementary material for: Melanotic Neuroectodermal Tumor of Infancy (MNTI) and Pineal Anlage Tumor (PAT) Harbor A Medulloblastoma Signature by DNA Methylation Profiling
Source: MDPI journal article supplement (doi:10.3390/cancers13040706), 2021-02-09
Supplement: s1 [file s1]

## Methylation profiling report

### General information

Sentrix ID: 203939360062\_R07C01  
Array type: EPIC  
Material type: FFPE DNA  
Gender: male

### Brain tumor methylation classifier results (v11b4)

#### Methylation classes (MCs with score $\geq 0.3$ )

methylation class family Medulloblastoma group 3 and 4

Calibrated score Interpretation

0.99 match

#### MC family members with score $\geq 0.1$

methylation class medulloblastoma, subclass group 3

0.99 match

Legend: Match (score  $\geq 0.9$ ) No match (score  $< 0.9$ ): possibly still relevant for low tumor content and low DNA quality cases. Match to MC family member (score  $\geq 0.5$ )

### Class descriptions

**Methylation class family Medulloblastoma group 3 and 4:** The methylation class family "Medulloblastoma class 3 and 4" comprises the methylation classes medulloblastoma, class 3 and medulloblastoma, class 4.

**Methylation class medulloblastoma, subclass group 3:** The methylation class "medulloblastoma, subclass group 3" is comprised of tumors with the diagnosis medulloblastoma, genetically defined, group 3. Histologically most cases fall into the classical and large cell/anaplastic groups. Tumors are located in the cerebellum, typically in the vermis. Median age is 4 years (range 1 to 17). Group 3 medulloblastomas are more common in males than females. MYC amplification, aneuploidy, isochromosome 17q and GF11/1B activation by enhancer hijacking are recurrent features, but a fraction lack an obvious driving genetic change.

### Copy number variation profile

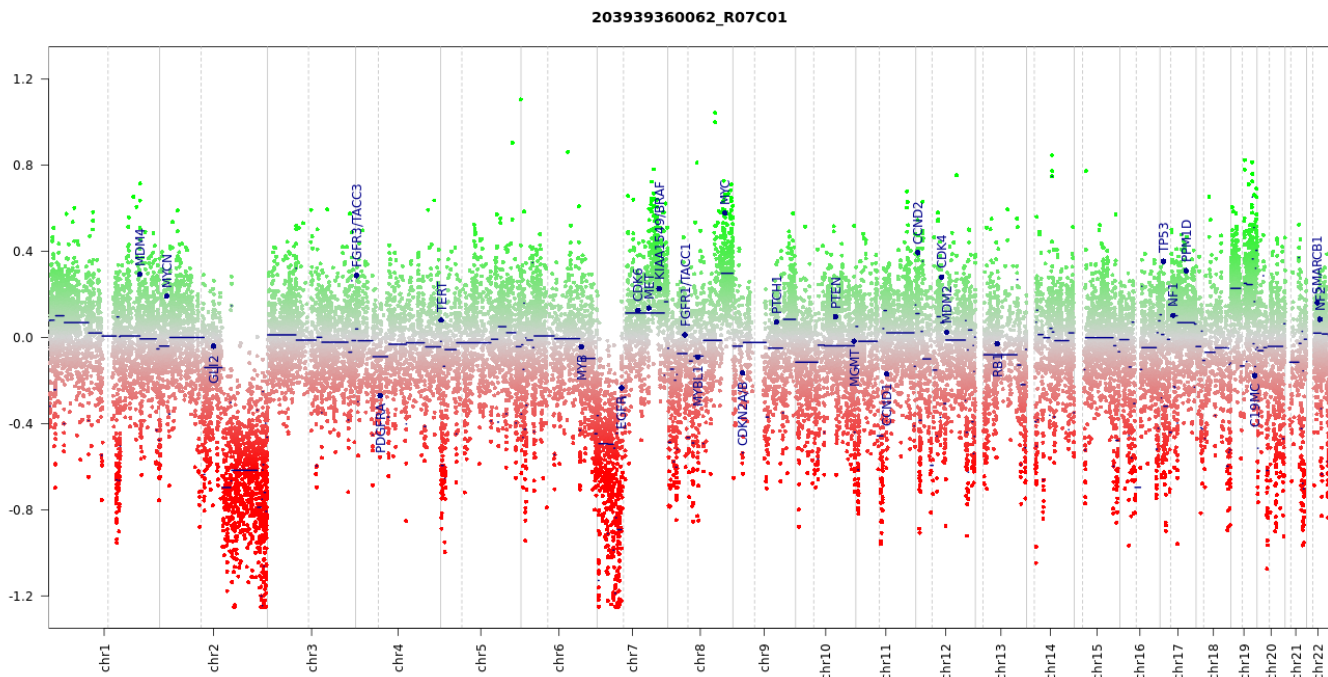

Depiction of chromosome 1 to 22 (and X/Y if automatic prediction was successful). Gains/amplifications represent positive, losses negative deviations from the baseline. 29 brain tumor relevant gene regions are highlighted for easier assessment.

(see Hovestadt & Zapatka, <http://www.bioconductor.org/packages/devel/bioc/html/conumee.html>)

# MGMT promotor methylation (MGMT-STP27)

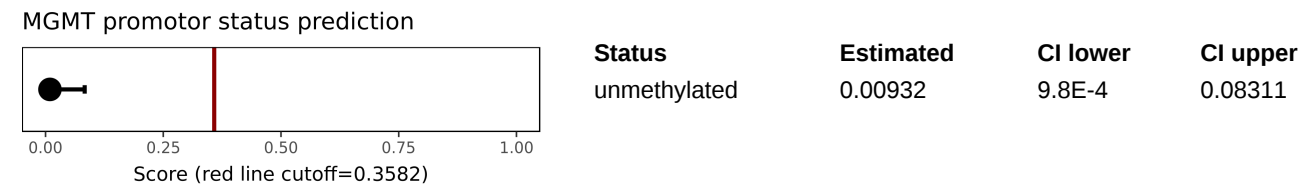

(see Bady et al, J Mol Diagn 2016; 18(3):350-61)

## Disclaimer

Classification using methylation profiling is a research tool under development, it is not verified and has not been clinically validated. Implementation of the results in a clinical setting is in the sole responsibility of the treating physician. Intended for non-commercial use only.

## Run information

Report: idat\_reportBrain\_v11b4 Version 2.0  
Task version:

| Task              | Version |
|-------------------|---------|
| idat_qc           | 2.0     |
| idat_predictBrain | 2.1     |
| idat_rs_gender    | 2.0     |
| idat_predictMGMT  | 2.0     |
| idat_cnvp         | 3.0     |
