# Supplementary material for: Melanotic Neuroectodermal Tumor of Infancy (MNTI) and Pineal Anlage Tumor (PAT) Harbor A Medulloblastoma Signature by DNA Methylation Profiling
Source: MDPI journal article supplement (doi:10.3390/cancers13040706), 2021-02-09
Supplement: s1 [file s1]

# Methylation profiling report

## General information

|                |                     |
|----------------|---------------------|
| Sentrix ID:    | 203724130138_R06C01 |
| Array type:    | EPIC                |
| Material type: | FFPE DNA            |
| Gender:        | male                |

## Medulloblastoma methylation classifier results (v1.0)

| Methylation classes (MCs with score >= 0.3)      | Calibrated score | Interpretation |   |
|--------------------------------------------------|------------------|----------------|---|
| medulloblastoma, subclass group 3/4, subtype II  | 0.48             | no match       | ✖ |
| medulloblastoma, subclass group 3/4, subtype III | 0.31             | no match       | ✖ |

Legend: ✔ Match (score  $\geq 0.9$ ) ✘ No match (score  $< 0.9$ ): possibly still relevant for low tumor content and low DNA quality cases. ● Match to MC family member (score  $\geq 0.5$ )

## Class descriptions

**Medulloblastoma, subclass group 3/4, subtype II:** The methylation class "medulloblastoma, subclass group 3/4, subtype II" is comprised of tumors with the diagnosis medulloblastoma. Histologically, most cases fall into the classic (50%) or large-cell/anaplastic group (45%) and 5% cases fall in the DN/MBEN group. Median age is 5 years (range 1 to 17). The majority (55%) are M+. Male:Female ratio is 3.3:1. Subtype II medulloblastomas are enriched for chr8 and chr17, isochromosome 17q (i17q), chr13q gain and chr 16 loss, and are enriched for MYC amplification (20% of cases). Subtype% in II is high-risk (5-year OS ~ 49% in retrospective series). This subtype is comprised of 100% Grp3 subgroup tumors.

**Medulloblastoma, subclass group 3/4, subtype III:** The methylation class "medulloblastoma, subclass group 3/4, subtype III" is comprised of tumors with the diagnosis medulloblastoma. Histologically, most cases fall into the classic (80%) or large-cell/anaplastic group (20%). Median age is 5 years (range 2 to 50). The majority (55%) are M+. Male:Female ratio is 3.6:1. Subtype III medulloblastomas are enriched for a characteristic 1q gain, and are enriched for MYC amplification (10% of cases). Subtype% in III is high-risk (5-year OS ~ 41 in retrospective series). This subtype is comprised of 100% Grp3 tumors.

### Copy number variation profile

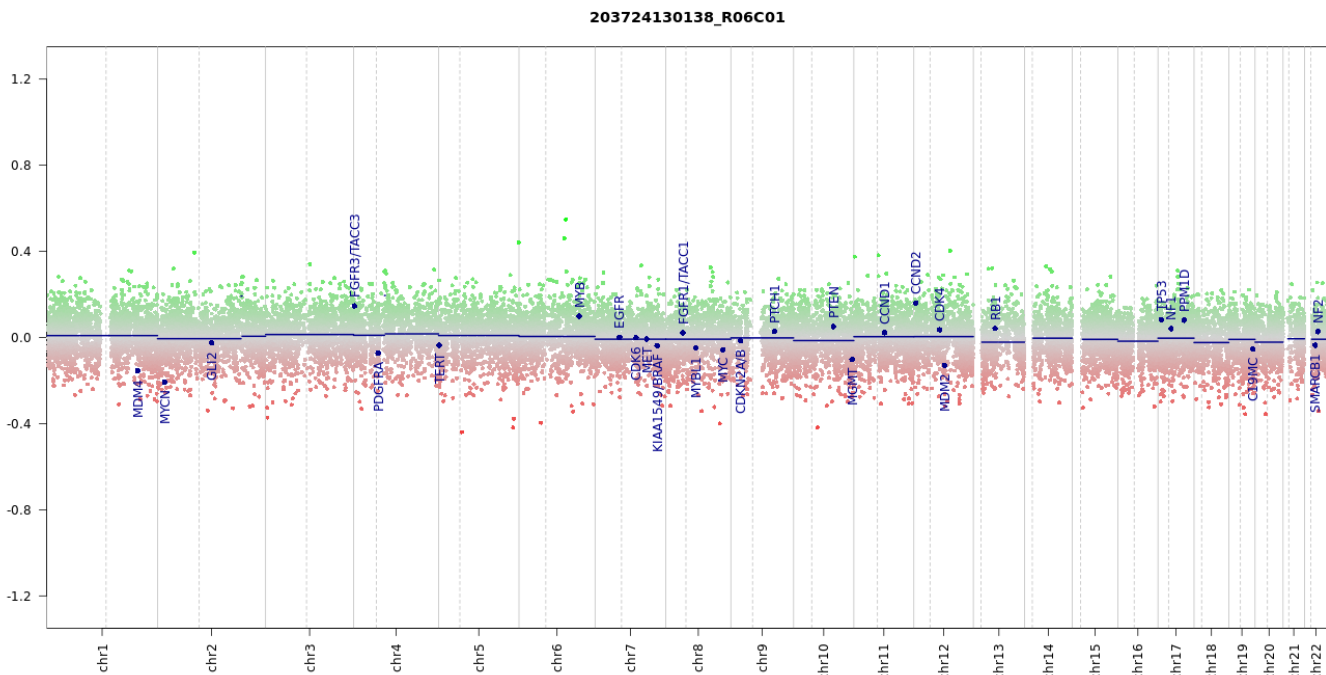

Depiction of chromosome 1 to 22 (and XY if automatic prediction was successful). Gains/amplifications represent positive, losses negative deviations from the baseline. 29 brain tumor relevant gene regions are highlighted for easier assessment.

(see Hovestadt & Zapatka, <http://www.bioconductor.org/packages/devel/bioc/html/conumee.html>)

MGMT promotor methylation (MGMT-STP27)

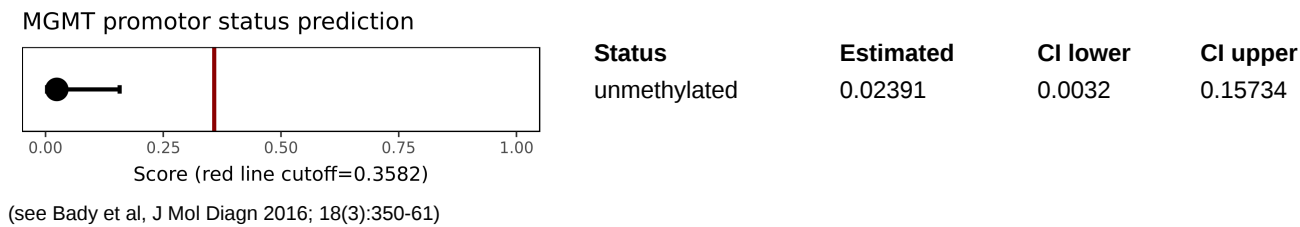

Disclaimer

Classification using methylation profiling is a research tool under development, it is not verified and has not been clinically validated. Implementation of the results in a clinical setting is in the sole responsibility of the treating physician. Intended for non-commercial use only.

Run information

Report: idat\_reportMeduloblastoma\_v1\_0 Version 1.0  
Task version:

| Task                       | Version |
|----------------------------|---------|
| idat_qc                    | 2.0     |
| idat_rs_gender             | 2.0     |
| idat_predictMGMT           | 2.0     |
| idat_cnvp                  | 3.0     |
| idat_predictMeduloblastoma | 1.0     |
