# Supplementary material for: Melanotic Neuroectodermal Tumor of Infancy (MNTI) and Pineal Anlage Tumor (PAT) Harbor A Medulloblastoma Signature by DNA Methylation Profiling
Source: MDPI journal article supplement (doi:10.3390/cancers13040706), 2021-02-09
Supplement: s1 [file s1]

Figure 1 is a scatter plot showing the distribution of 1000 randomly sampled genes across 20 clusters. The y-axis represents the number of genes (0.0 to 1.2), and the x-axis represents the clusters (clst1 to clst20). A horizontal blue line is drawn at y=0.0. Genes are colored green for positive values and red for negative values. The plot shows a clear separation between the positive and negative gene sets across the clusters.

[illegible]
