# Supplementary figures and images for: Melanotic Neuroectodermal Tumor of Infancy (MNTI) and Pineal Anlage Tumor (PAT) Harbor A Medulloblastoma Signature by DNA Methylation Profiling
Source: MDPI journal article supplement (doi:10.3390/cancers13040706), 2021-02-09

# Cluster dendrogram with p-values (%)

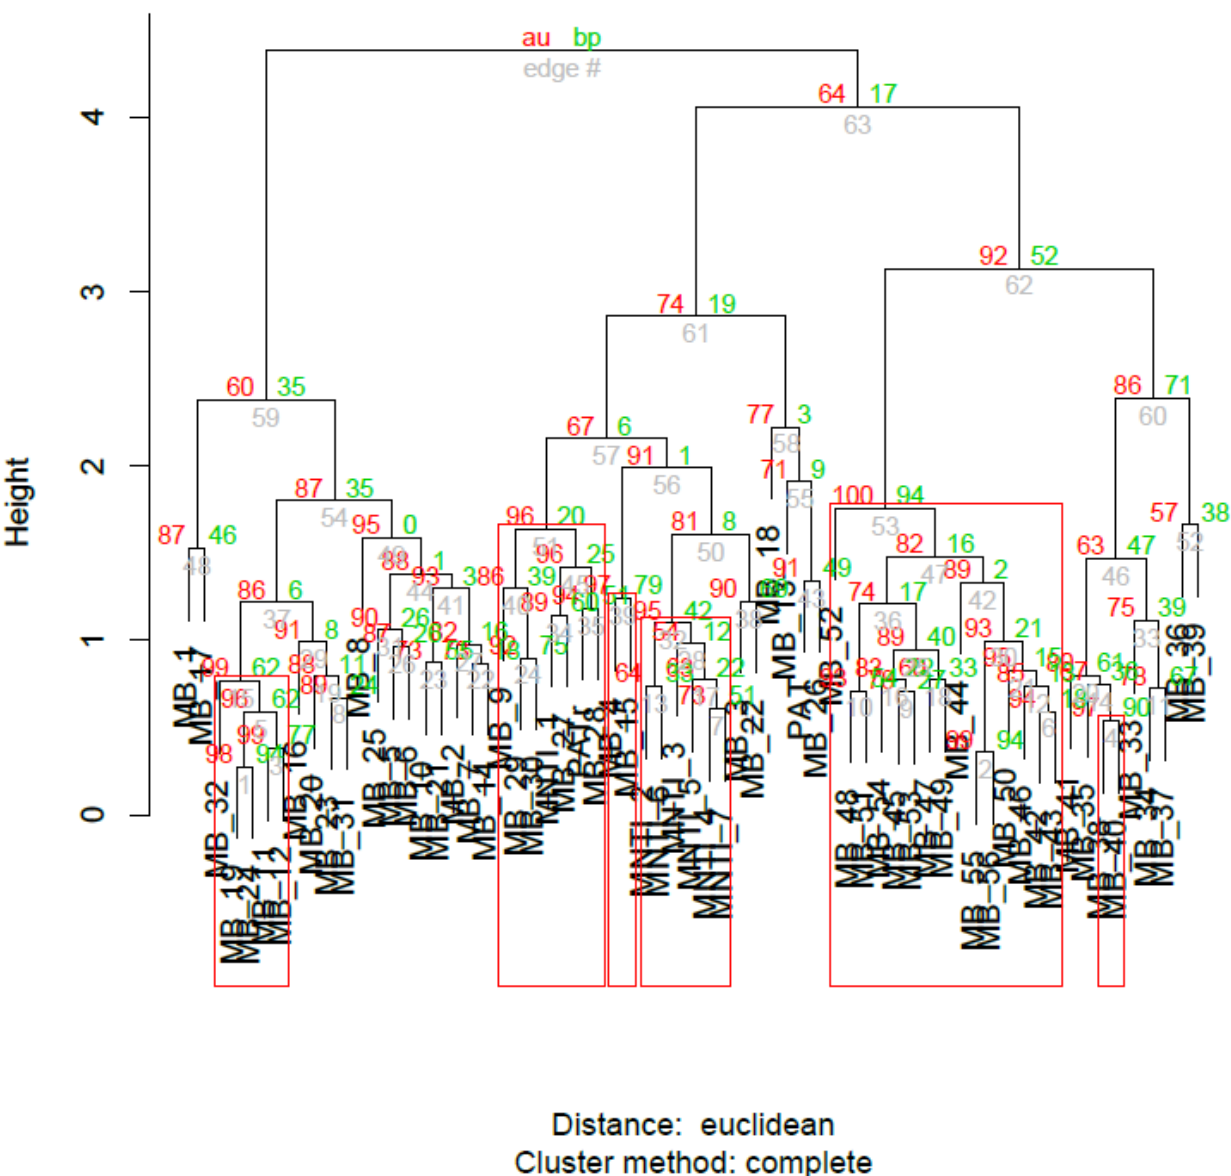

Supplement: s1 [file s1]

# PAT

PLEX, PED B

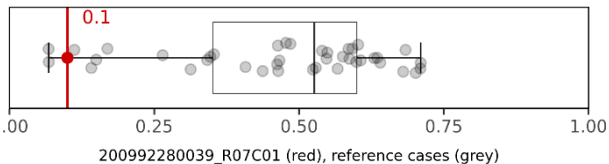

# PATr

MB, G3

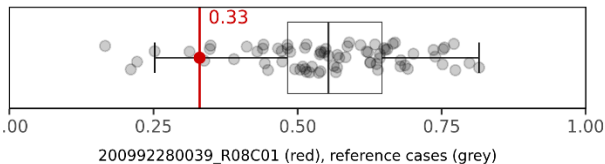

# MNTI1

MB, G3

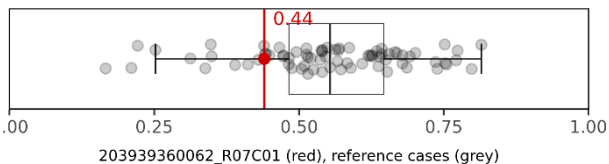

# MNTI2

MB, G3

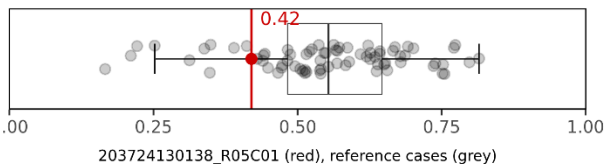

# MNTI3

MB, G3

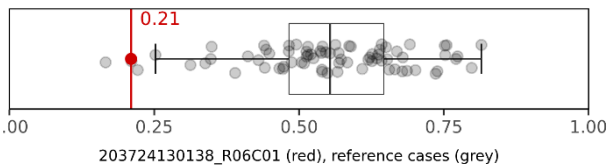

# MNTI4

MB, G3

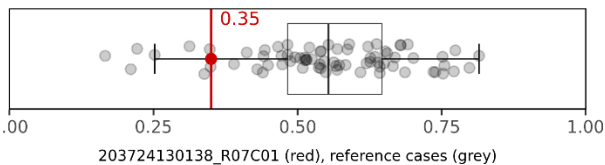

# MNTI5

MB, G3

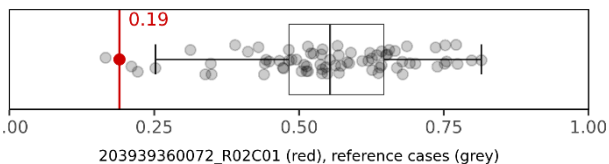

# MNTI6

MB, G3

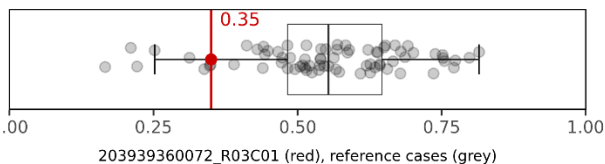

# MNTI7

MB, G3

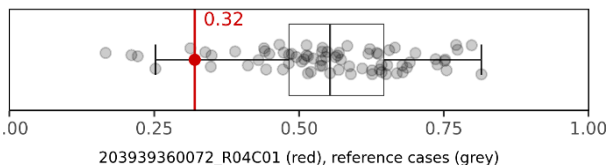

Supplement: s1 [file s1]
